# Supplementary material for: Isolation ssDNA aptamers specific for both live and viable but nonculturable stateVibrio vulnificususing whole bacteria-SEILEX technology
Source: Royal Society of Chemistry journal article supplement (doi:10.1039/c9ra10733a), 2020-01-01
Supplement: c9ra10733a1.pdf [file c9ra10733a1.pdf]

## Isolation ssDNA Aptamers Specific for both Live and Viable but Nonculturable State *Vibrio vulnificus* using Whole Bacteria-SELEX Technology

Dejing Liu, Bo Hu, Dingfa Peng, Shan Lu, Shunxiang Gao, Shengqun Ouyang, Zhengang Li, Lianghua Wang, and Binghua Jiao

| No. | Sequences                                                | Repeat |
|-----|----------------------------------------------------------|--------|
| V08 | <u>AGTATACGTATTACCTGCAGCCAATCATGACCGCCACCTCACTCGGC</u>   | 2      |
|     | <u>AAGATCTCCGAGATATCG</u>                                |        |
| V09 | <u>AGTATACGTATTACCTGCAGCCCTGGACATCATTGAGTACTCGTCTGC</u>  | 1      |
|     | <u>AAGATCTCCGAGATATCG</u>                                |        |
| V11 | <u>AGTATACGTATTACCTGCAGCTCCCAACCAATACCAGTACGTTGTAGC</u>  | 1      |
|     | <u>AAGATCTCCGAGATATCG</u>                                |        |
| V12 | <u>AGTATACGTATTACCTGCAGCTATGGATTTGCGTCATGTTTATGTGGCA</u> | 1      |
|     | <u>AGATCTCCGAGATATCG</u>                                 |        |
| V13 | <u>AGTATACGTATTACCTGCAGCCCAACCCTATGCTTCAACGGTCTTTGCA</u> | 3      |
|     | <u>AGATCTCCGAGATATCG</u>                                 |        |
| V18 | <u>AGTATACGTATTACCTGCAGCTGTGGGTGGGTGGTGGTATCTGCAGC</u>   | 2      |
|     | <u>AAGATCTCCGAGATATCG</u>                                |        |
| V20 | <u>AGTATACGTATTACCTGCAGCCATCCCCTCTCCTGTTGCCCTGACAGCA</u> | 1      |
|     | <u>AGATCTCCGAGATATCG</u>                                 |        |
| V28 | <u>AGTATACGTATTACCTGCAGCCCTGGACATCATTGAGTACTCGTCTGC</u>  | 2      |
|     | <u>AAGATCTCCGAGATATCG</u>                                |        |
| V31 | <u>AGTATACGTATTACCTGCAGCTGTGGGTGGGATTAGGTTCGGGTGGGC</u>  | 1      |
|     | <u>AAGATCTCCGAGATATCG</u>                                |        |
| V38 | <u>AGTATACGTATTACCTGCAGCCAGACTTCAATCGCGTCAACCGTTGC</u>   | 1      |
|     | <u>AAGATCTCCGAGATATCG</u>                                |        |
| V39 | <u>AGTATACGTATTACCTGCAGCTGATGGTTGTATGACTGGATGTCAAGC</u>  | 1      |
|     | <u>AAGATCTCCGAGATATCG</u>                                |        |
| V40 | <u>AGTATACGTATTACCTGCAGCTCCCCTTTCATGGCGGTGACTGGC</u>     | 2      |
|     | <u>AAGATCTCCGAGATATCG</u>                                |        |
| V41 | <u>AGTATACGTATTACCTGCAGCCACCTAGAACACATTGCAACATTAGGC</u>  | 2      |
|     | <u>AAGATCTCCGAGATATCG</u>                                |        |
| V44 | <u>AGTATACGTATTACCTGCAGCTGCTCCTCGACTGTTGTTAATCGTGGCA</u> | 1      |
|     | <u>AGATCTCCGAGATATCG</u>                                 |        |
| V49 | <u>AGTATACGTATTACCTGCAGCTGACATCGTCTGACCTCCACAAGCAGC</u>  | 1      |
|     | <u>AAGATCTCCGAGATATCG</u>                                |        |
| V53 | <u>AGTATACGTATTACCTGCAGCTGGGTCCGTATGTTGGTGTATGTGAGC</u>  | 1      |
|     | <u>AAGATCTCCGAGATATCG</u>                                |        |
| V59 | <u>AGTATACGTATTACCTGCAGCTGTATACCCGACCGTACCGACGTAAGC</u>  | 1      |
|     | <u>AAGATCTCCGAGATATCG</u>                                |        |
| V69 | <u>AGTATACGTATTACCTGCAGCTCACCTTACACACTCCCTTCTTCGGCA</u>  | 2      |
|     | <u>AGATCTCCGAGATATCG</u>                                 |        |
| V71 | <u>AGTATACGTATTACCTGCAGCCCTGTACAAGCAGTATGTCAGCTGAGC</u>  | 1      |
|     | <u>AAGATCTCCGAGATATCG</u>                                |        |

Supplementary Table 1. Candidate aptamer sequences

| Selection round | Amount of ssDNA pool ( pmol ) | Negative selections | Counter-SELEX incubation time(min) | Positive SELEX incubation time (min) | Wash times after incubation(min) |
|-----------------|-------------------------------|---------------------|------------------------------------|--------------------------------------|----------------------------------|
| 1-7             | 2000                          | ×                   | /                                  | 120                                  | 3                                |
| 8-10            | 200                           | √                   | 120                                | 120                                  | 4                                |
| 10-13           | 150                           | √                   | 180                                | 60                                   | 5                                |

**Supplementary Table 2. Summary of selection protocol for *V. vulnificus* whole-bacteria SELEX**

| Values of 40 blank samples detections |   |   |   |   |   |   |   |
|---------------------------------------|---|---|---|---|---|---|---|
| 0                                     | 0 | 0 | 0 | 0 | 0 | 0 | 0 |
| 0                                     | 0 | 0 | 0 | 0 | 0 | 0 | 0 |
| 0                                     | 0 | 1 | 1 | 1 | 1 | 1 | 1 |
| 2                                     | 2 | 2 | 2 | 3 | 3 | 3 | 4 |
| 4                                     | 4 | 5 | 5 | 6 | 7 | 7 | 7 |

**Supplementary Table 3. Values of 40 blank samples detected by V8-flow cytometer method, sorted in ascending order, from left to right, top to bottom. The 38<sup>th</sup> value is the LOB.**

| <b>Conc.</b>     | <b>Values of 12 repeat detections</b> |     |     |     |     |     |     |     |     |     |     |     | <b>Mean</b> | <b>SD</b> |       |
|------------------|---------------------------------------|-----|-----|-----|-----|-----|-----|-----|-----|-----|-----|-----|-------------|-----------|-------|
| <b>25cfu/ml</b>  | 27                                    | 24  | 56  | 37  | 46  | 25  | 46  | 35  | 59  | 47  | 28  | 36  | 38          | 38.77     | 11.42 |
| <b>50cfu/ml</b>  | 44                                    | 73  | 60  | 37  | 57  | 70  | 40  | 66  | 59  | 58  | 59  | 69  | 57          | 57.61     | 11.26 |
| <b>100cfu/ml</b> | 87                                    | 89  | 112 | 122 | 95  | 92  | 81  | 115 | 108 | 124 | 107 | 89  | 102         | 101.77    | 14.04 |
| <b>150cfu/ml</b> | 163                                   | 185 | 138 | 136 | 145 | 138 | 165 | 153 | 143 | 175 | 152 | 168 | 158         | 155.31    | 15.38 |
| <b>300cfu/ml</b> | 285                                   | 297 | 278 | 303 | 296 | 309 | 316 | 312 | 329 | 311 | 322 | 303 | 302         | 304.85    | 14.08 |

**Supplementary Table 4. Low concentrations of measurement for LOD calculation.**

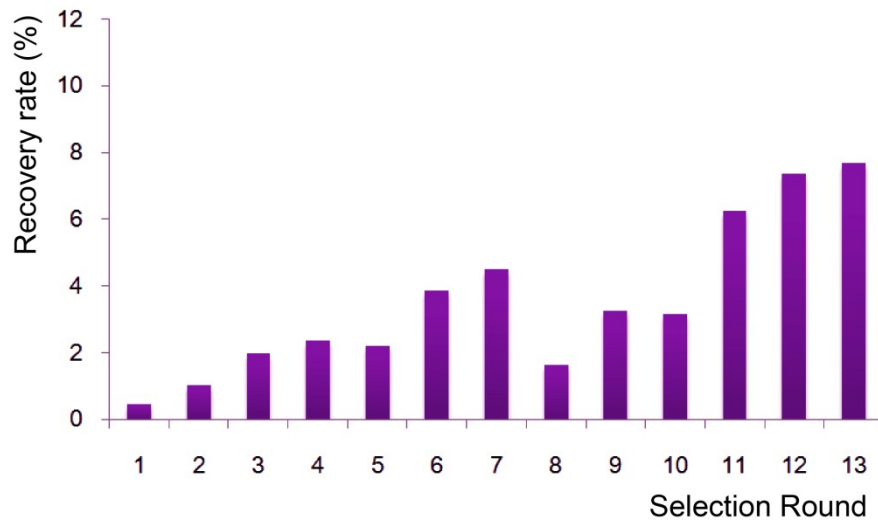

**Supplementary Figure 1. Enrichment of ssDNA pool during bacteria-SELEX.** The bar graph shows the amount of ssDNA recovered from the supernatant in each selection round.

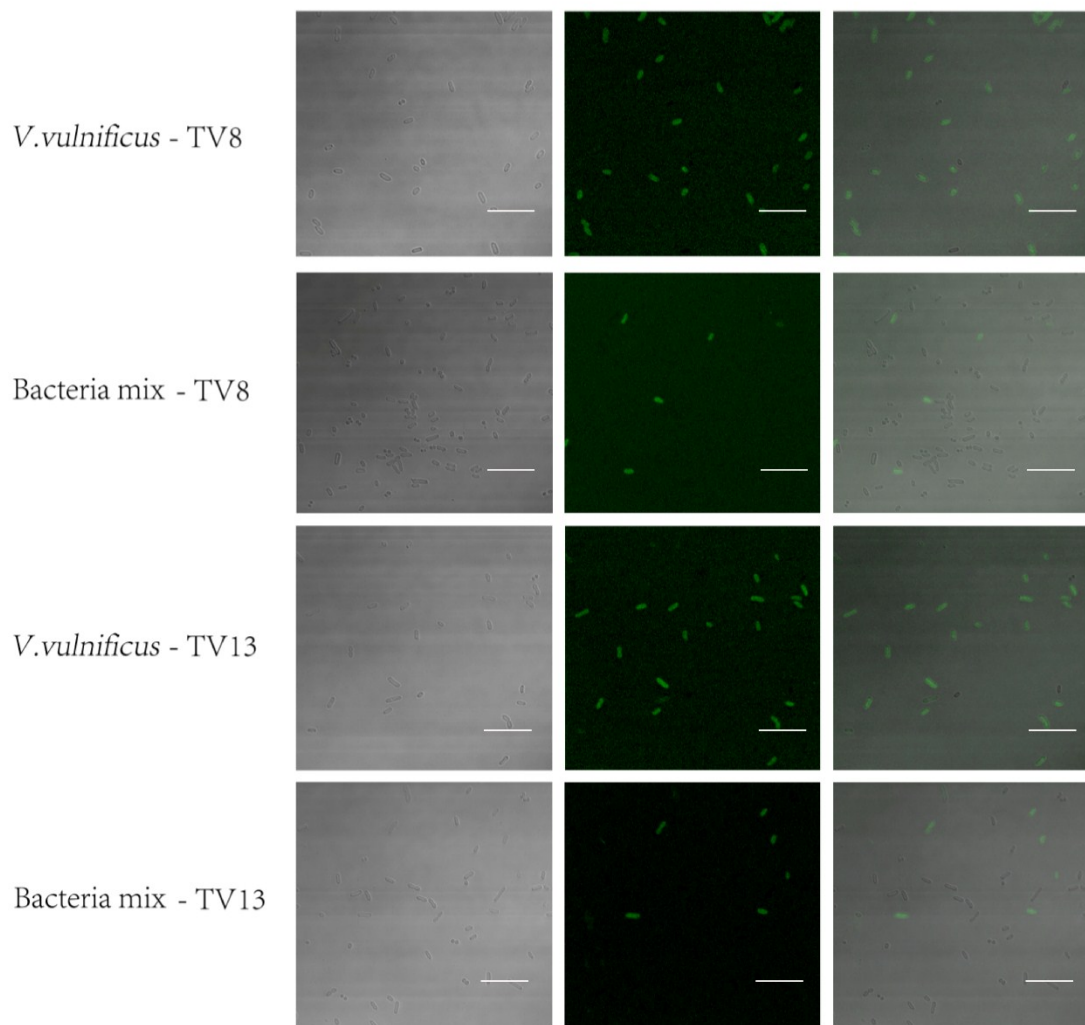

**Supplementary Figure 2. Binding ability of TV8, V13 were evaluated by confocal fluorescence microscopic.** When incubated together with *S. aureus* and *C. albicans*, TV8 and V13 can successfully pick *V. vulnificus* out. (Scale bar, 10 μm)

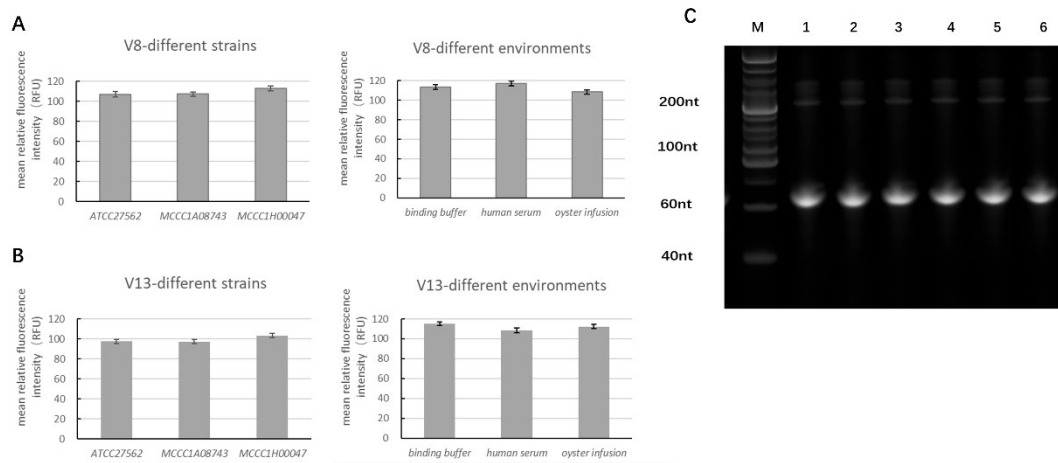

**Supplementary Figure 3. Effect of different strains and different binding environment on binding ability of V8 and V13** **A.** The comparison of binding performance of V8 and V13 on different *V.vulnificus* strains and in different binding environments. **B.** The comparison of binding performance of V8 and V13 on different *V.vulnificus* strains and in different binding environments. **C.** Gel electrophoresis results of aptamers incubated in different environments. Lane 1, V8 in binding buffer. Lane 2, V8 in human serum. Lane 3, V8 in oyster infusion. Lane 4, V13 in binding buffer. Lane 5, V13 in human serum. Lane 6, V13 in oyster infusion.

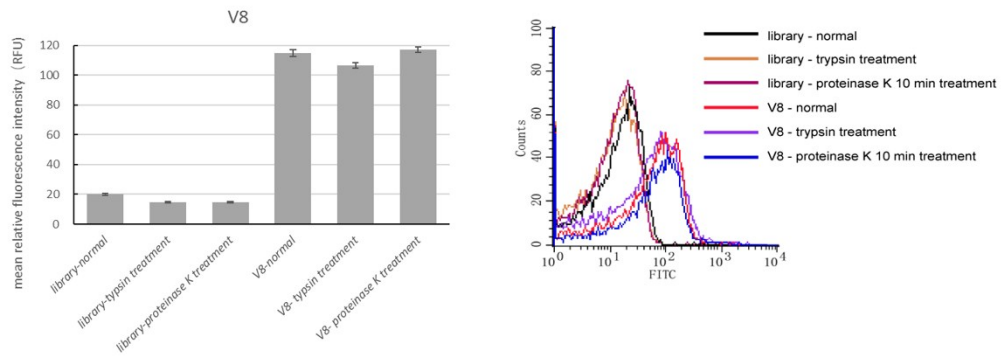

**Supplementary Figure 4. Aptamer V8 bind to protein-free *V. vulnificus***

10min of proteinase K treatment and 30 min of trypsin treatment on *V. vulnificus* did not cause significant fluorescent signal change compare to wild *V. vulnificus* cells. Bar plot and flow cytometry results are showed simultaneously.
